# Supplementary material
Source: PubMed Central journal article supplement (PMC3993717)
Supplement: JVI.03336-13_zjv999098836so1.pdf [file JVI.03336-13_zjv999098836so1.pdf]

SUPPLEMENTAL FIG S1 Nucleotide sequences of TEV-Ros1 and TEVΔNIb-Ros1 clones. Recombinant clones in which NIb was relocated to different intergenic positions (TEVΔNIb-Ros1-NIb1 to 9) are like TEVΔNIb-Ros1 but with the insertions indicated in each case. TEV sequence corresponds to Genbank accession number DQ986288, but includes two silent mutations (G273A and A1119G, in red) to eliminate endogenous Eco31I restriction sites. Cistron borders are highlighted on blue background. NIb sequence is in blue. *Antirrhinum majus* Ros1 cDNA is in red. In TEV-Ros1, Ros1 is flanked with sequences (in green and underlined) that complement NIaPro proteolytic sites and mediate releasing from the viral polyprotein. Amino and carboxy terminal sequences next to the relocated NIb in some of the clones (TEVΔNIb-Ros1-NIb1, 2, 3 and 9) to complement processing from the viral polyprotein are in green and underlined.

>TEV-Ros1

AAAATAACAAATCTCAACACAACATATACAAAACAACGAATCTCAAGCAATCAAGCATTCTACTTCTATTGCAGCAATTTAAAT  
 CATTCTTTTTAAAGCAAAAGCAATTTTCTGAAAATTTTACCATTACGAAACGATAGCCATGGCACTCATCTTTGGCACAGTCAA  
 CGCTAACATCCTGAAGGAAGTGTTCGGTGGAGCTCGTATGGCTTGCCTTACCAGCGCACATATGGCTGGAGCGAATGGAAGCATT  
 TTGAAGAAGGCAGAAGAACCCTCTCGTCAATCATGCACAAACCAGTGATCTTCGGAGAAGACTACATTACCAGGCAGACTTGC  
 CTTACACACCACTCCATTTAGAGGTCGATGCTGAAATGGAGCGGATGTATTATCTTGGTCTCGCGCGCTCACCCATGGCAAGAG  
 ACGCAAAGTTTTCTGTGAATAACAAGAGGAACAGGAGAAGGAAAGTGGCCAAAACGTACGTGGGGCGTGATTCCATTGTTGAGAAG  
 ATTGTAGTGCCCCACACCGAGAGAAAAGGTTGATACCACAGCAGCAGTGGAAAGACATTTGCAATGAAGCTACCCTCAACTTGTGC  
 ATAATAGTATGCCAAAGCGTAAGAAAGCAGAAAACTTCTTGCCCGCCACTTCACTAAGTAACGTGTATGCCCAAACCTTGGAGCAT  
 AGTGGCAAACGCCATATGCAGGTGGAGATCATTAGCAAGAAGAGCGTCCGAGCGAGGGTCAAGAGATTTGAGGGCTCGGTGCAA  
 TTGTTTCGCAAGTGTGCGTACATGTATGGCGAGAGGAAAAGGGTGGACTTACGTATTGACAACGGCAGCAAGAGACACTTCTAG  
 ACCTTGCTAAAAGATTTAAGAATGAGAGAGTGGATCAATCGAAGCTCACTTTTGGTTCAAGTGGCCTAGTTTTGAGGCAAGGCTC  
 GTACGGACCTGCGCATTGGTATCGACATGGTATGTTCAATGTACGCGGTGCGTGGATGGGATGTTGGTGGATGCTCGTGGGAAG  
 GTAACGTTTCGCTTTTGTCACTCAATGACACATTATAGCGACAAATCAATCTCTGAGGCATTTTTCATACCATACTCTAAGAAAT  
 TCTTGGAGTTGAGCCAGATGGAATCTCCCATGAGTGTACAAGAGGAGTATCAGTTGAGCGGTGCGGTGAGGTGGCTGCAATCCT  
 GACACAAGCACTTTTACCCTGTGGTAAAGATCACATGCAAAACGTTGCATGGTTGAAACACCTGACATTTGTTGAGGGTGTGCGGA  
 GACAGTGTACCAACCAAGGTAAGCTCCTAGCAATGCTGAAAGAACAGTATCCAGATTTCCCAATGGCCGAGAAACTACTCACAA  
 GGTTTTTGAACAGAAATCACTAGTAAATACAAATTTGACAGCCTGCGTGAGCGTCAAACAACCTCATTTGGTGACCGCAAACAAGC  
 TCCATTACACACGTAAGTGTGCTGAGCGAAATTTCTGTTTAAAGGCAATAAACTAACAGGGGCCGATCTCGAAGAGGCAAGCACA  
 CATATGCTTGAATAGCAAGGTTCTTGAACAATCGCACTGAAAATATGCGCATTTGGCCACCTTGGTTCTTTTTCAGAAATAAAATCT  
 CATCGAAGGCCCATGTGAATAACGCACTCATGTGTGATAATCAACTTGATCAGAAATGGGAATTTTATTTGGGGACTAAGGGGTGC  
 ACACGCAAAGAGGTTTCTTAAAGGATTTTCTACTGAGATTGACCCAAATGAAGGATACGATAAGTATGTTATCAGGAAACATATC  
 AGGGGTAGCAGAAAGCTAGCAATTTGCAATTTGATAATGTCAACTGACTTCCAGACGCTCAGGCAACAAATTTCAAGGCGAAACTA  
 TTGAGCGTAAAGAAATTTGGGAATCACTGCATTTCAATGCGGAATGGTAAATTACGTGTACCCATGTTGTTGTGTTACTCTTTGAAGA  
 TGGTAAGGCTCAATATTCGGATCTAAAGCATCCAACGAAGAGACATCTGGTCAATTTGGCAACTCTGGCGATTCAAAGTACCTAGAC  
 CTTCCAGTTCTCAATGAAGAGAAAATGTATATAGCTAATGAAGGTTATTGCTACATGAACATTTTCTTTGCTCTACTAGTGAATG  
 TCAAGGAAGAGGATGCAAAGGACTTACCAAGTTTATAAGGGACACAATTTGTTCCAAAGCTTGGAGCGTGGCCAAACAATGCAAGA  
 TGTTGCAACTGCATGCTACTTACTTTCCATTTCTTTACCCAGATGTCTGAGTGTGAATTACCCAGAATTTTGGTTGATCATGAC  
 AACAAAACAATGCATGTTTTGGATTGATGCGTATGGGTCTAGAACGACAGGATACCACATGTTGAAAATGAACACAACATCCCAGCTAA  
 TTGAATTCGTTTCATTACAGGTTTGAATCCGAAATGAAAATTTACAATGTTGGAGGGATGAACCGAGATATGGTTCACACAAGGTGC  
 AATTGAGATTGATCAAGTCCATATACAAACCATCTCATGAAGCAGTTACTTTGAGGAGGAGCATAACATAAATGTTCTCCAGGCA  
 ATAGTCTCCCCTTCAATTTTAAATTTGCCATGTACAACCTTGGAACTTTTGGAGCGGTTTACAAATGTGGTTGCCAAATACAATGA  
 GGTTAGCTAACCTCGCTGCCATCTTGTGAGCCTTTGGCGCAAAAGTTAACTTTTGGCAGACTTGTTCGTTCCAGCAGCGTAATTTGAT  
 TAATGAGTATGCGCAGGTAATTTTGGACAATCTGATTGACGGTGTGAGGGTTAACCATTCGCTATCCCTAGCAATGGAAATTTGTT  
 ACTATTAAGCTGGCCACCCAAAGAGATGGACATGGCGTTGAGGGAAAGTGGCTATGCTGTGACCTCTGAAAAGGTGCATGAAATGT  
 TGGAAAAAACTATGTAAAGGCTTTTGAAGGATGCATGGGACGAATTAACCTTGGTTGGAAAAATTTCCGCAATCAGGCATTCAG  
 AAAGCTCTTGAATTTGGGCGAAAGCCTTTAATCATGAAAAACACCGTAGATTGCGGCGGACATATAGACTTGTCTGTGAAATCG  
 CTTTTCAAGTTCCACTTGGAACTCCTGAAGGGAACCATCTCAAGAGCCGTAATGGTGGTGAAGAAAGGTAAGAGTAGCGAAGA  
 ATGCCATGACAAAAGGGGTTTTTCTCAAATCTACAGCATGCTTCTGACGCTTACAAGTTTATCACAGTCTCGAGTGTCTTTCT  
 CTTGTTGTTGACATTTCTTATTTCAAATGACTGCATGATAAGGGCACACCGAGAGGCGAAGGTTGCTGCACAGTTGCAGAAAGAG  
 AGCGAGTGGGACAATATCATCAATAGAATTTCCAGTATTTAAGCTTGAATAATCCTATTGGCTATCGCTTACAGCGGAGGAAA  
 GACTCCAATCAGAACACCCCGAGGCTTTTCGAGTACTACAAGTTTTCATTTGCAATTTGAAAAGGAAGACCTCGTTGAACAGGCAAAACAACC  
 GGAGATAGCATACTTTGAAAAGATTATAGCTTTTTCATCACACTTGTATTAATGGCTTTTGGAGCTGAGCGGAGTGATGGAGTGTTC  
 AAGATACTCAATAAGTTCAAAGGAATACTGAGCTCAACGGAGAGGGAGATCATCTACACGCAGAGTTTGGATGATTACGTTACAA  
 CCTTTGATGACAATATGACAATCAACCTCGAGTTGAATATGGATGAACTCCACAAGACGAGCCTTCCGGAGTCACTTTTAAGCA  
 ATGGTGGAAACAACCAATCAGCCGAGGCAACGTGAAGCCACATTTATAGAATGAGGGGCACCTTTCATGGAGTTTACCAGAGATACT  
 GCGGCATCGTTGCCAGCGAGATATCACACTCACCCGCAAGAGATTTTCTTGTGAGAGGTGCTGTGTTGGATCTGGAAAATCCACAG  
 GACTTCCATAACCATTTATCAAAGAGAGGAGAGGTTAATGCTTGGAGCTTACCAGACCCTCACAGATAACGTGCAACAAGCAACT  
 GAGAAGTGAACCATTTAAGTCTTCCCAACTTTGAGGATGAGAGGGAAGTCAACTTTTGGGTCATCACCGATTACAGTCACTGACT  
 AGTGGATTGCTTTTACACCATTTTGCACGAAACATAGCTGAGGTAAAAACATACGATTTTGTGATAAATGATGAATGTCATGTGA  
 ATGATGCTTCTGCTATAGCGTTTGAAGATCTACTGTTTGAACATGAATTTGAAGGAAAAGTCCCTCAAAGTGTGAGCCACACCACC  
 AGGTAGAGAAGTTGAATTCACAACCTCAGTTTCCCGTGAAACTCAAGATAGAAGAGGCTCTTAGCTTTTCCAGGAATTTGTAAGTTTA

CAAGGGACAGGTGCCAACGCCGATGTGATTAGTTGTGGCGACAACATACTAGTATATGTTGCTAGCTACAATGATGTTGATAGTC  
TTGGCAAGCTCCTTTGTGCAAAAAGGGATACAAAGTGTGCAAGATTTGATGGAAGAACAATGAAGAGTGGAGGAACGAAATAATCAC  
TGAAGGTACTTCAGTGAAAAAGCATTTCATAGTCGCAACTAATAATTTTGAAGATGGTGTAAACCATTGACATTGATGTAGTTGTG  
GATTTTGGGACTAAGGTTGTACCAGTTTGGATGTGGACAATAGAGCGGTGCAGTACAACAAAACCTGTGGTGAGTTATGGGGAGC  
GCATCCAAAGACTCGGTAGAGTTGGGGCAGACAAAGGAAGGAGTAGCACTTCGAAATGGCCAAAACAAATAAAACACTGGTTGAAAT  
TCCAGAAATGGTTGCCACTGAAGCTGCCTTTCTATGCTTCATGTACAATTTGCCAGTGACAACACAGAGTGTTCACACCACACTG  
CTGAAAAATGCCACATTATTACAAGCTAGAACTATGGCACAGTTTGGAGTATCATATTTTTTACACAATTAATTTTGTGCGATTTG  
ATGGTAGTATGCATCCAGTCATACATGACAAGCTGAAGCGCTTTAAGCTACACACTTGTGAGACATTCCTCAATAAGTTGGCGAT  
CCCAAATAAAGGCTTATCCTCTTGGCTTACGAGTGGAGAGTATAAGCGACTTGGTTACATAGCAGAGGATGCTGGCATAAGAATC  
CCATTCGTGTGCAAAGAAATTCAGACTCCTTGCATGAGGAAATTTGGCACATTTGTAGTCGCCCATAAAGGTGACTCGGGTATTG  
GGAGGCTCACTAGCGTACAGGCAGCAAAGGTTGTTTATACTCTGCAAACGGATGTGCACCTAATTCGAGGACTCTAGCATGCAT  
CAATAGACTCATAGCACATGAACAAATGAAGCAGAGTCATTTTGAAGCCGCAACTGGGAGAGCATTTTCTTCCAAATTTACTCA  
ATACAAAGCATATTTGACACGCTGAAAGCAAATTTATGCTACAAAGCATAAGAAAGAAATATTGCAGTGCCTCAGCAGGCAAAG  
ATCAATTTGCTAGAGTTTTTGC AACCTAGCAAAGGATCAAGATGTCACGGGTATCATCCAAGACTTCAATCACCTGGAAACTATCTA  
TCTCCAATCAGATAGCGAAGTGGCTAAGCATCTGAAGCTTAAAAGTCACTGGAATAAAAGCCAAATCAC TAGGGACATCATAATA  
GCTTTGTCTGTGTTAATTTGGTGGTGGATGGATGCTTGC AACGTACTTCAAGGACAAGTTCAATGAACCAGTCTATTTCCAAGGGA  
AGAAGAATCAGAAGCACAAGCTTAAGATGAGAGAGGCGCGTGGGGCTAGAGGGCAATATGAGGTTGCAGCGGAGCCAGAGGCGCT  
AGAACATTACTTTGGAAGCGCATATAATAACAAAGGAAAGCGCAAGGGCACCACGAGAGGAATGGGTGCAAAGTCTCGGAAATTC  
ATAAACATGTATGGGTTTGTATCCAATGATTTTTCATACATTAGGTTTGTGGATCCATTGCAGGTCACACTATTGTAGTCCAA  
CAAACGCACCTATTGATTTAGTCAGCATGAGTTTGGAAAGTTTGAACACGCATGTTAATTCAGCATGAGATGAGCCCTCAAAG  
TCTTAGCACCCACACCACAATCCATGCTTATTTGGTGAATAGTGGCACGAAGAAAGTTCTTAAGGTTGATTTAACACCACACTCG  
TCGCTACGTGCGAGTGAGAAATCAACAGCAATAATGGGATTTCTGAAAGGGAGAAATGAATTCGCTCAAACCGGCATGGCAGTGC  
CAGTGGCTTATGATCAATTTGCCACCAAAGAGTGGAGACTTGCAGTTTGAAGGAGAAAGCTTGTTTAAGGGACCACGTGATTACAA  
CCCATATCGAGCACCATTGTCACTTGCAGAAATGAATCTGATGGGCACACAACATCGTTGTATGGTATTGGATTGGTCCCTTC  
ATCATTACAAAACAGCACTTGTTTAGAAGAAATAATGGAACACTGTTGGTCCAATCACTACATGGTGTATTCAAGGTCAAGAACA  
CCACGACTTTGCAACAACACCTCATTGATGGGAGGGACATGATAAATATTCGCATGCCTAAGGATTTCCCACCATTTCTCAAAA  
GCTGAAATTTAGAGAGCCACAAAGGGAAGAGCGCATATGCTTGTGACAACCAACTTCCAAACTAAGAGCATGCTTAGCATGGTG  
TCAGACACTAGTTGCACATTCCTTTCATCTGATGGCATAATCTGAAAGCATGGATTCAAACCAAGGATGGGCAGTGTGGCAGTC  
CATTAGTATCAACTAGAGATGGGTTCAATTGTTGGTATACACTCAGCATCGAATTTACCAACACAAACAATTTATTTCAAGCGT  
GCCGAAAAACTTCATGGAATTTGTTGACAAATCAGGAGGCGCAGCAGTGGGTTAGTGGTTGGCGATTAATGCTGACTCAGTATTG  
TGGGGGGCCATAAAGTTTTTCATGAGCAAACCTGAAGAGCCTTTTCAGCCAGTTAAGGAAGCGACTCAACTCATGAGTGAATGG  
TGTACTCGCAAAGGGGAGAAGAGGAAATGGGTCGTGGAAGCACTGTCAGGGAACCTTGAGGCCAGTGGCTGAGTGTCCAGTCAGTT  
AGTCACAAAGCATGTGGTTAAAGGAAAGTGTCCCTCTTTGAGCTCTACTTGCAGTTGAATCCAGAAAAGGAAGCATATTTTAA  
CCGATGATGGGAGCATATAAGCCAAGTCGACTTAATAGAGAGGCGTTCCCAAGGACATTCATAAATATGCTAGTGAATTTGAGA  
TTGGGAATGTGGATTGTGACTTGTGCTGGAGCTTGCATAAGCATGCTCATCACAAAGTCAAGGCGTTAGGATTTCCCACTGTGAA  
CTACATCACTGACCCAGAGGAAATTTTGTGCAATGAATATGAAAGCAGTATGGGAGCACATACAAAGGCAAGAAGAAGAA  
GCTCTCAGCGAGCTCACACTAGATGAGCAGGAGGCAATGCTCAAAGTTCGCTGCGACTATACAAAGGCAAGGAAAGCTGGAAATTT  
GGAATGGCTCATTGAAAGCAGAGTTCGCTCCAATTTGAGAAGTTGAAACACAAAACCGCAACTTTTCAGAGCAGCACAATAGA  
CACTCTTCTTGTGGTAAAGTTTGCCTGGATGATTTCAACAATCAATTTTATGATCTCAACATAAAGGCACCATGGACAGTTGGT  
ATGACTAAGTTTTATCAGGGGTGGAATGAATTTGATGGAGGCTTTACCAAGTGGGTGGGTGATTGTTGACGCTGATGGTTCCGAAT  
TCGACAGTTCCCTGACTCCATTCCCTCATTAATGCTGTATTGAAAGTGGACTTGCCTTCATGGAGGAATGGGATATTGGTGGCA  
AATGCTGCGAAATTTGTACACTGAGATAGTGTATACACCAATCCTCACACCGGATGGTACTATCATTAAGAAGCATAAAGGCAAC  
AATAGCGGGCAACCTTCAACAGTGGTGGACAACACACTCATGGTCAATTTATGCAATGTTATACACATGTGAGAAGTGTGGAATCA  
ACAAGGAAGAGATTGTGATTACGTCATGCGGATGACCTATTGATTGCCATTCAACCAGATAAAGTGGAGGTTGAGTGGATT  
CAAAGAATCTTTCCGAGAGTTGGCCCTGAAATATGAATTTGACTGCACCACCAGGACAAGACACAGTTGTGGTTTATGTCACAC  
AGGGCTTTGGAGAGGGATGGCATGTATATACAAAGCTAGAAGAAGAAAGGATTTTCTATTTTGGAAATGGGACAGATCCAAAG  
AGCCGTCACATAGGCTTGAAGCCATCTGTGCATCAATGATCGAAGCATGGGTTTATGACAAGTGGTTGAAGAAATCCGCAATTT  
CTATGCATGGGTTTTGGAACAAGCGCCGATTTACAGCTTGCAGAAAGGAAAGGCGCCATATCTGGCTGAGACTGCGCTTAAG  
TTTTTGTACACATCTCAGCACGGAACAAACTCTGAGATAGAAGAGTATTTAAAAGTGTGTATGATTACGATATTTCAACGACTG  
AGAATCTTTATTTTCACTCAGGTACAATGAAAAAGAAATGTCGTGGAGTGAGAAAAGGTACTTTGGACCAGAAGAAGACACTCT  
CTTGAGGCAATGTATAGAAGAGTATGGTGAAGGGAAATGGCATCAAGTTCCACACAGAGCAGGGTTGAACCGGTGTAGGAAGAGT  
TGCAGGCTGAGGTGGTTGAATTTCTGAGGCCAAATATCAAAGAGGTCGGTTTTTCGAGAGATGAAGTGGACCTAATTTGTGAGG  
TTCATAAGCTGTTGGGTAACAAATGGTCTGATTTGCTGGTAGAATTCCTGGAAGGACAGCTAATGACGTGAAGAAGCTTTGGAA  
TACTCATGTGGGGAAGAAATTTAGGCGAGGATGGAGAAGTCCCGGAAAAATTTATGAACACAAAAACCTTAAGCTGACTAAT  
ATCGTAAGACCCCGAGCTCGGACTTCAACGGATTCACGCTTACTTTGGCCAGAGATAAGTTCGGAAAAACCGATGAATTTTCAAATG  
TCCGGTTAACAACCTGATGAGATTCAGATTTGAGAAGCAAACGCAATTTTACAATGATGTTGCGCTCGCCACAAGATGAAGTTGA  
AGACTGCATTCACTGGTGGAGTAAGTTGCTAGAAAACAACGGAGGATGGGGAATTAGGAAACCTATTTCGAGGAGGCCCAACAAAT  
GGAAATACTACAGAGAACTTCACTTTCAAGTGGCACTGTGGGTGCTGGTGTGACGCTGGTAAGAAGAAAGATCAAAGGATG  
ATAAAGTCTGCTGAGCAGGCTTCAAAGGATAGGGATGTTAATGCTGGAACCTCAGGAACATTTCTAGTTCCACGAATAAATGCTAT  
GGCCACAAAACCTCAATATCCAAGGATGAGGGGAGAGGTTGGTTGTAACCTTGAATCACCTTTTATAGGATACAAGCCACAGCAAT  
GATTTGTCAAATGCTCGAGCCACACATGAGCAGTTTCCCGCTGGCATCAGGCAGTATGACAGCTTATGGAGTGAATGAAGAGC  
AAATGAAATATTTGCTAAATGGATTTATGGTGTGGTGCATAGAAAATGGGACTTCCCAAATTTGAACGGAACCTGGGTTATGAT  
GGATGGTGGAGCAAGTTTCATACCCGCTGAAACCAATGGTTGAAAACGCGCAGCCAACACTGAGGCAAATTTATGACACACTTC  
AGTGACCTGGCTGAAGCGTATATTGAGATGAGGAATAGGGAGCGACCATACATGCCTAGGTATGGTCTACAGAGAAACATTACAG  
ACATGAGTTTGTACGCTATGCGTTGACTTCTATGAGCTAACTTCAAAAACACCTGTTAGAGCGAGGGAGGCGCATATGCAAT  
GAAAGCTGCTGCAGTACGAAACAGTGGAACTAGGTTATTTGGTCTTGTATGGCAACGTGGGTACTGCAGAGGAAGACACTGAACGG

CACACAGCGCACGATGTGAACCGTAACATGCACACACTATTAGGGGTCCGCCAGTGATAGTTTTCTGCGTGTCTTTGCTTTCCGCT  
TTTAAGCTTATTGTAATATATATGAATAGCTATTCACAGTGGGACTTGGTCTTGTGTGAATGGTATCTTATATGTTTTAATATG  
TCTTATTAGTCTCATTACTTAGGCGAACGACAAGTGAGGTCACCTCGGTCTAATTCCTATGTAGTGCGAGAAAAA  
AAAAAAAAAAAAAAAAAAAAAAAAAAAAAAAA

>TEVANIb-Ros1

AAAATAACAAATCTCAACACAACATATACAAAACAAACGAATCTCAAGCAATCAAGCATTCTACTTCTATTGCAGCAATTTAAAT  
CATTTCTTTTAAAGCAAAAGCAATTTTCTGAAAATTTTACCATTACGAACGATAGCCATGGCACTCATCTTTGGCACAGTCAA  
CGCTAACATCCTGAAGGAAGTGTTCGGTGGAGCTCGTATGGCTTGCCTTACCAGCGCACATATGGCTGGAGCGAATGGAAGCATT  
TTGAAGAAGGCAGAAGAACCCTCTCGTCAATCATGCACAAACAGTGTATCTCGGAGAAGACTACATTACCAGGCAGACTTGC  
CTTACACACCCTCCATTTAGAGGTCGATGCTGAAATGGAGCGGATGATTATCTTGGTCTGCGCGCTCACCCATGGCAAGAG  
ACGCAAAGTTTTCTGTGAATAACAAGAGGAACAGGAGAAGGAAAGTGGCCAAAACGTACGTGGGGCGTGATTCCATTGTTGAGAAG  
ATTGTAGTGCCCCACCCGAGAGAAAGGTTGATACCACAGCAGCAGTGGAAAGACATTTGCAATGAAGCTACCACCAACTTGTGC  
ATAATAGTATGCCAAAGCGTAAGAAGCAGAAAACTTCTTGCCCGCCACTTCACTAAGTAACGTGTATGCCAAACTTGGAGCAT  
AGTGCGCAAAACGCCATATGCAGGTGGAGATCATTAGCAAGAAGAGCGTCCGAGCGAGGGTCAAGAGATTTGAGGGCTCGGTGCAA  
TTGTTTCGCAAGTGTGCGTCACATGTATGGCGAGAGGAAAAAGGTGGACTTACGTATTGACAACGGCAGCAAGAGACACTTCTAG  
ACCTTGCTAAAAGATTTAAGAATGAGAGAGTGGATCAATCGAAGCTCACTTTTGGTTCAAGTGGCCTAGTTTTGAGGCAAGGCTC  
GTACGGACCTGCGCATTGGTATCGACATGGTATGTTTATTGACGCGTTCGGTTCGGATGGGATGTTGGTGGATGCTCGTGCGAAG  
GTAACGTTGCGTGTGTTGCTACTCAATGACACATTAAGCGACAAATCAATCTCTGAGGCATCTTCATACCATACTTAAGAAAT  
TCTTGGAGTTGAGCCAGATGGAATCTCCCATGAGTGTACAAGAGGAGTATCAGTTGAGCGGTGCGGTGAGGTGGCTGCAATCCT  
GACACAAGCATTTCACCGTGTGGTAAAGATCACATGCAAAACGTTGCATGGTTGAAACACCTGACATTTGTTGAGGGTGGTTCGGGA  
GACAGTGTACCAACCAAGGTAAGCTCCTAGCAATGCTGAAAGAACAGTATCCAGATTTCCCAATGGCCGAGAACTACTCACAA  
GGTTTTTGAACAGAAATCACTAGTAAATACAAATTTGACAGCCTGCGTGAGCGTCAAACAACCTCATTTGGTGACCGCAAACAAGC  
TCCATTACACACGTAAGTGTGTCAGCGAAATTTCTGTTTAAAGGCAATAAATAACAGGGGCGGATCTCGAAGAGGCAAGCACA  
CATATGCTTGAATAGCAAGGTTCTTGAACAATCGCACTGAAAATATGCGCATTTGGCCACCTTGGTTCTTTTCAAGAAATAAATCT  
CATCGAAGGCCCATGTGAATAACGCACTCATGTGTGATAATCAACTTGTATCAGAAATGGGAATTTTATTTGGGGACTAAGGGGTGC  
ACACGCAAAGAGGTTTTCTTAAAGGATTTTTCTACTGAGATTGACCCAAATGAAGGATACGATAAGTATGTTATCAGGAAACATATC  
AGGGGTAGCAGAAAGCTAGCAATTTGCAATTTGATAATGTCAACTGACTTCCAGACGCTCAGGCAACAAATTCAGGCGAAACTA  
TTGAGCGTAAAGAAATTTGGGAATCACTGCATTTCAATGCGGAATGGTAAATTACGTGTACCCATGTTGTTGTGTTACTCTTGAAGA  
TGGTAAGGCTCAATATTCGGATCTAAAGCATCCAACGAAGAGACATCTGGTCAATGGCAACTCTGGCGATTCAAAGTACCTAGAC  
CTTCCAGTTCTCAATGAAGAGAAAAATGTATATAGCTAATGAAGGTTATTGCTACATGAACATTTTCTTTGCTCTACTAGTGAATG  
TCAAGGAAGAGGATGCAAAAGGACTTCCCAAGTTTTATAAGGGACACAATTTGTTCCAAAGCTTGGAGCGTGGCCAACAATGCAAGA  
TGTTGCAACTGCATGCTACTTACTTTCCATTCTTTACCCAGATGTCTGAGTGTGAATTTACCCAGAATTTTGGTTGATCATGAC  
AACAAAACAATGCATGTTTTGGATTCTGATGGGTCTAGAACGACAGGATACCCATGTTGAAAATGAACACAACATCCCAGCTAA  
TTGAATTCGTTCAATCAGGTTTGAATCCGAAATGAAAACCTTACAATGTTGGAGGGATGAACCGAGATATGGTCACACAAGGTGC  
AATTGAGATGTTGATCAAGTCCATATACAAACCACATCTCATGAAGCAGTTACTTGGAGGAGGACCATACATAATTTGCTCTGGCA  
ATAGTCTCCCCTTCAATTTAATTTGCCATGTACAACCTTGGAACTTTTGGAGCAGGTTACAAAATGTTGTTGCCAAATAAATGAG  
GGTTAGCTAACCTTCGCTGCCATTTGTCAGCCTTGGCGCAAAGTTTAACTTTTGGCAGACTTGTTCGTTCCAGCAGCATAATTTGAT  
TAATGAGTATGCGCAGGTAATTTTGGACAATCTGATTGACGGTGTCAAGGTTAACCATTTCGCTATCCCAGCAATGGAATTTGTT  
ACTATTAAGCTGGCCACCCAAAGAGATGGACATGGCGTTGAGGGAAGGTGGCTATGCTGTGACCTCTGAAAAGGTGCATGAAATGT  
TGGAAAAAAATATGTAAGGCTTTGAAAGGATGCATGGGACGAATTAACCTTGGTTGGAAAAATTTCTCCGCAATCAGGCATTCAAG  
AAAGCTCTTGAATTTGGGCGAAAGCCTTTAATCATGAAAAACCCGTAGATTGCGGCGGACATATAGACTTGTCTGTGAAATCG  
CTTTTCAAGTTCCACTTGGAACTCCTGAAGGGAACCATCTCAAGAGCCGTAATGGTGGTGAAGAAAGGTAAGAGTAGCGAAGA  
ATGCCATGACAAAAGGGTTTTTCTCAAAATCTACAGCATGCTTCTGACGCTTACAAGTTTATCAGAGTCTCGAGTGTCTTTT  
CTTGTGTTGACATTTCTTATTTCAAATGACTGCATGATAAGGGCACACCGAGAGGCGAAGGTTGCTGCACAGTTGCAGAAAGAG  
AGCGAGTGGGACAATATCATCAATAGAACTTCCAGTATTTAAGCTTGAATCCTATTGGCTATCGCTCTACAGCGGAGGAAA  
GACTCCAATCAGAACACCCCGAGGCTTTCGAGTACTACAAGTTTTGCAATGGAAAGGAAGACCTCGTTGAACAGGCAAAACAACC  
GGAGATAGCATACTTTGAAAAGATTATAGCTTTTCATCACACTTGTATTAATGGCTTTTGGAGCTGAGCGGAGTGATGGAGTGTTC  
AAGATACTCAATAAGTTCAAAGGAATACTGAGCTCAACGGAGAGGGAGATCATCTACACGCAAGATTTGGATGATTACGTTACAA  
CCTTTGATGACAATATGACAATCAACCTCGAGTTGAATATGGATGAACTCCACAAGACGAGCCTTCCCTGGAGTCACTTTTAAGCA  
ATGGTGGAAACAACCAATCAGCCGAGGCAACGTGAAGCCACATTTATAGAATGAGGGGCACCTTTCATGGAGTTTACCAGAGATACT  
GCGGCATCGGTTGCCAGCGAGATATCACACTCACCCGCAAGAGATTTTCTTGTGAGAGGTGCTGTTGGATCTGGAATAACACAG  
GACTTCCATAACCATTTATCAAAGAGAGGGAGAGTGTAAATGCTTGGAGCTACCAGACCACCTCACAGATAACGTGCACAAGCAACT  
GAGAAGTGAACCAATTTAACTGCTTCCCAACTTTGAGGATGAGAGGGAAGTCAACTTTTGGGTCATCACCATTACAGTCAAGTACT  
AGTGGATTGCTTTTACCACTTTTGCACGAAACATAGCTGAGGTAAAACATACGATTTTGTGATAATTTGATGAATGTGATGTTGA  
ATGATGCTTCTGCTATAGCGTTTGAAGATCTACTGTTTGAACATGAATTTGAAGGAAAAGTCCCTCAAAGTGTGAGCCACACCACC  
AGGTAGAGAAGTTGAATTCACAACCTCAGTTTTCCCGTGAACCTCAAGATAGAAGAGGCTCTTAGCTTTTCAAGGAATTTGTAAGTTTA  
CAAGGGACAGGTGCCAACGCCGATGTGATTAGTTGTGGCGACAACATACTAGTATATGTTGCTAGCTACAATGATGTTGATAGTCT  
TTGGCAAGCTCCTTGTGCAAAAAGGGATACAAAGTGTGCAAGATTGATGGAAAGAACAATGAAGAGTGGAGGAACTGAAATAATCAC  
TGAAGGTAAGTTCAGTGAAAAAGCATTTTCATAGTCGCAACTAATATTTATGAGAATGGTGTAAACCATTGACATTTGATGTTGTTG  
GATTTTGGGACTAAGGTTGTACCAGTTTTGGATGTGGACAATAGAGCGGTGCAGTACAACAAAACGTGGTGGTATGTTGGGGAGC  
GCATCCAAAGACTCGGTAGAGTTGGGCGACACAAGGAAGGAGTAGCACTTCGAATTTGGCCAAAACAATAAACAACCTGGTTGAAAT  
TCCAGAAATGGTTGCCACTGAAGCTGCCTTTCTATGCTTTCATGTACAATTTGCCAGTGACAACACAGAGTGTTCACACCACACTG  
CTGGAATAATGCCACATTATTACAAGCTAGAACTATGGCACAGTTTGGAGTATCATATTTTACACAATTAATTTTGTGCGATTTG  
ATGGTAGTATGCATCCAGTCATACATGACAAGCTGAAGCGCTTTAAGCTACACACTTGTGAGACATTCCTCAATAAGTTGGCGAT  
CCCAAATAAAGGCTTATCTTGGCTTACGAGTGGAGAGTATAAGCGACTTGGTTACATAGCAGAGGATGCTGGCATAAGAATC



>TEVΔNIB-Ros1-Nib2 (Nib insertion between positions 1056-1057 of TEVΔNIB-Ros1; Nib included the indicated extra nucleotides)

AGCGACAAAGGGGAGAAGAGGAAATGGGTCGTGGAAGCACTGTCAGGGAACCTTGAGGCCAGTGGCTGAGTGTCCCAGTCAGTTAG TCACAAAGCATGTGGTTAAAGGAAAGTGTCCCCCTCTTTGAGCTCTACTTGACAGTTGAATCCAGAAAAGGAAGCATATTTTAAACC GATGATGGGAGCATATAAGCCAAGTCGACTTAATAGAGAGGCGTTCCCTCAAGGACATTCATAAAATATGCTAGTGAATTTGAGATT GGGAAATGTGGATTGTGACTTGGCTGGAGCTTGCAATAAGCATGCTCATCACAAAGCTCAAGGCGTTAGGATTCCCAACTGTGAACT ACATCACTGACCCAGAGGAAATTTTTAGTGCATTGAATATGAAAGCAGCTATGGGAGCACTATACAAAGGCAAGAAGAAAGAAGC TCTCAGCGAGCTCACACTAGATGAGCAGGAGGCAATGCTCAAAGCAAGTTGCCCTGCGACTGTATACGGGAAAGCTGGGAATTTGG AATGGCTCATTGAAAGCAGAGTTGCGTCCAATTGAGAAGGTTGAAAACAACAAAACGCGAACTTTCACAGCAGCACC AATAGACA CTCTTCTTGCTGGTAAAGTTTTCGCTGGATGATTTCAACAATCAATTTTATGATCTCAACATAAAGGCACCATGGACAGTTGGTAT GACTAAGTTTTATCAGGGGTGGAATGAATTGATGGAGGCTTTACCAAGTGGGTGGGTGTATTGTGACGCTGATGGTTCGCAATTC GACAGTTCCTTGACTCCATTCCCTCATTAATGCTGTATTGAAAGTGCAGCTTGCCCTCATGGAGGAATGGGATATTGGTGAGCAAA TGCTGCGAAATTTGTACACTGAGATAGTGTATACACCAATCCTCACACCGGATGGTACTATCATTAAGAAGCATAAAGGCAACAA TAGCGGGCAACCTTCAACAGTGGTGGACAACACACTCATGGTCATTAATTGCAATGTTATACACATGTGAGAAGTGTGGAATCAAC AAGGAAGAGATTGTGTATTACGTC AATGGCGATGACCTATTGATTGCCATTCACCCAGATAAAGCTGAGAGGTTGAGTGGATTCA AAGAATCTTTTCGGAGAGTTGGGCCTGAAATATGAATTTGACTGCACCACCAGGGACAAGACACAGTTGTGGTTCATGTCACACAG GGCTTTGGAGAGGGATGGCATGTATATAACCAAAGCTAGAAGAAGAAAGGATTGTTTCTATTTTGGAAATGGGACAGATCCAAAGAG CCGTCACATAGGCTTGAAGCCATCTGTGCATCAATGATCGAAGCATGGGGTTATGACAAGCTGGTTGAAGAAATCCGCAATTTCT ATGCATGGGTTTTGGAACAAGCGCCGATTTACAGCTTGCAGAAGAAGGAAAGGCGCCATATCTGGCTGAGACTGCGCTTAAGTT TTTGTACACATCTCAGCACGGAACAAACTCTGAGATAGAAGAGTATTTAAAAGTGTGTATGATTACGATATTCCAACGACTGAG AATCTTTATTTTCAG

>TEVΔNIB-Ros1-Nib3 (Nib insertion between positions 2433-2434 of TEVΔNIB-Ros1; Nib included the indicated extra nucleotides)

GGGATGAACGGGGAGAAGAGGAAATGGGTCGTGGAAGCACTGTCAGGGAACCTTGAGGCCAGTGGCTGAGTGTCCCAGTCAGTTAG TCACAAAGCATGTGGTTAAAGGAAAGTGTCCCCCTCTTTGAGCTCTACTTGACAGTTGAATCCAGAAAAGGAAGCATATTTTAAACC GATGATGGGAGCATATAAGCCAAGTCGACTTAATAGAGAGGCGTTCCCTCAAGGACATTCATAAAATATGCTAGTGAATTTGAGATT GGGAAATGTGGATTGTGACTTGGCTGGAGCTTGCAATAAGCATGCTCATCACAAAGCTCAAGGCGTTAGGATTCCCAACTGTGAACT ACATCACTGACCCAGAGGAAATTTTTAGTGCATTGAATATGAAAGCAGCTATGGGAGCACTATACAAAGGCAAGAAGAAAGAAGC TCTCAGCGAGCTCACACTAGATGAGCAGGAGGCAATGCTCAAAGCAAGTTGCCCTGCGACTGTATACGGGAAAGCTGGGAATTTGG AATGGCTCATTGAAAGCAGAGTTGCGTCCAATTGAGAAGGTTGAAAACAACAAAACGCGAACTTTCACAGCAGCACC AATAGACA CTCTTCTTGCTGGTAAAGTTTTCGCTGGATGATTTCAACAATCAATTTTATGATCTCAACATAAAGGCACCATGGACAGTTGGTAT GACTAAGTTTTATCAGGGGTGGAATGAATTGATGGAGGCTTTACCAAGTGGGTGGGTGTATTGTGACGCTGATGGTTCGCAATTC GACAGTTCCTTGACTCCATTCCCTCATTAATGCTGTATTGAAAGTGCAGCTTGCCCTCATGGAGGAATGGGATATTGGTGAGCAAA TGCTGCGAAATTTGTACACTGAGATAGTGTATACACCAATCCTCACACCGGATGGTACTATCATTAAGAAGCATAAAGGCAACAA TAGCGGGCAACCTTCAACAGTGGTGGACAACACACTCATGGTCATTAATTGCAATGTTATACACATGTGAGAAGTGTGGAATCAAC AAGAAAGAGATTGTGATATTACGTC AATGGCGATGACCTATTGATTGCCATTCACCCAGATAAAGCTGAGAGGTTGAGTGGATTGATGGATTCA AAGAATCTTTTCGGAGAGTTGGGCCTGAAATATGAATTTGACTGCACCACCAGGACAAGACACAGTTGTGGTTCATGTCACACAG GGCTTTGGAGAGGGATGGCATGTATATAACCAAAGCTAGAAGAAGAAAGGATTGTTTCTATTTTGGAAATGGGACAGATCCAAAGAG CCGTCACATAGGCTTGAAGCCATCTGTGCATCAATGATCGAAGCATGGGGTTATGACAAGCTGGTTGAAGAAATCCGCAATTTCT ATGCATGGGTTTTGGAACAAGCGCCGATTTACAGCTTGCAGAAGAAGGAAAGGCGCCATATCTGGCTGAGACTGCGCTTAAGTT TTTGTACACATCTCAGCACGGAACAAACTCTGAGATAGAAGAGTATTTAAAAGTGTGTATGATTACGATATTCCAACGACTGAG AATCTTTATTTTCAG

>TEVΔNIB-Ros1-Nib4 (Nib insertion positions 3474-3475 of TEVΔNIB-Ros1)

GGGGAGAAGAGGAAATGGGTCGTGGAAGCACTGTCAGGGAACCTTGAGGCCAGTGGCTGAGTGTCCCAGTCAGTTAGTGCACAAAGC ATGTGGTTAAAGGAAAGTGTCCCCCTCTTTGAGCTCTACTTGACAGTTGAATCCAGAAAAGGAAGCATATTTTAAACC GATGATGGG AGCATATAAGCCAAGTCGACTTAATAGAGAGGCGTTCCCTCAAGGACATTCATAAAATATGCTAGTGAATTTGAGATTGGGAATGTG GATTGTGACTTGGCTGGAGCTTGCAATAAGCATGCTCATCACAAAGCTCAAGGCGTTAGGATTCCCAACTGTGAACTACATCACTG ACCCAGAGGAAATTTTTAGTGCATTGAATATGAAAGCAGCTATGGGAGCACTATACAAAGGCAAGAAGAAAGAAGCTCTCAGCGA GCTCACACTAGATGAGCAGGAGGCAATGCTCAAAGCAAGTTGCCCTGCGACTGTATACGGGAAAGCTGGGAATTTGGAATGGCTCA TTGAAAGCAGAGTTGCGTCCAATTGAGAAGGTTGAAAACAACAAAACGCGAACTTTCACAGCAGCACC AATAGACACTCTTCTTG CTGGTAAAGTTTTCGCTGGATGATTTCAACAATCAATTTTATGATCTCAACATAAAGGCACCATGGACAGTTGGTATGACTAAGTT TTATCAGGGGTGCAATGAATTGATGGAGGCTTTACCAAGTGGGTGGGTGTATTGTGACGCTGATGGTTCGCAATTCGACAGTTCC TTAGACTCCATTCCCTCATTAAATGCTGTATTGAAAGTGCAGCTTGCCCTCATGGAGGAATGGGATATTGGTGAGCAAAATGCTGCGAA ATTTGTACACTGAGATAGTGTATACACCAATCCTCACACCGGATGGTACTATCATTAAGAAGCATAAAGGCAACAATAGCGGGCA ACCTTCAACAGTGGTGGACAACACACTCATGGTCATTAATTGCAATGTTATACACATGTGAGAAGTGTGGAATCAACAAGGAAGAG ATTGTGTATTACGTC AATGGCGATGACCTATTGATTGCCATTCACCCAGATAAAGCTGAGAGGTTGAGTGGATTCAAGAATCTT TCGGAGAGTTGGGCCTGAAATATGAATTTGACTGCACCACCAGGGACAAGACACAGTTGTGGTTCATGTCACACAGGGCTTTGGA GAGGGATGGCATGTATATAACCAAAGCTAGAAGAAGAAAGGATTGTTTCTATTTTGGAAATGGGACAGATCCAAAGAGCCGTCACAT AGGCTTGAAGCCATCTGTGCATCAATGATCGAAGCATGGGGTTATGACAAGCTGGTTGAAGAAATCCGCAATTTCTATGCATGGG TTTTGGAAACAAGCGCCGATTTACAGCTTGCAGAAGAAGGAAAGGCGCCATATCTGGCTGAGACTGCGCTTAAGTTTTTGTACAC ATCTCAGCACGGAACAAACTCTGAGATAGAAGAGTATTTAAAAGTGTGTATGATTACGATATTCCAACGACTGAGAATCTTTAT TTTTCAG

>TEVΔNIB-Ros1-Nib5 (Nib insertion between positions 3633-3634 of TEVΔNIB-Ros1)

GGGGAGAAGAGGAAATGGGTTCGTGGAAGCACTGTCAGGGAACCTTGAGGCCAGTGGCTGAGTGTCCCAGTCAGTTAGTCACAAAGC  
ATGTGGTTAAAGGAAAGTGTCCCCTCTTTGAGCTCTACTTGCAGTTGAAATCCAGAAAAGGAAGCATATTTTAAACCGATGATGGG  
AGCATATAAGCCAAGTCGACTTAATAGAGAGGCGTTCCCTCAAGGACATTTCTAAAAATATGCTAGTGAATTTGAGATTGGGAATGTG  
GATTGTGACTTGTCTGGAGCTTGAATAAGCATGCTCATCACAAAGCTCAAGGCGTTAGGATTCCCAACGTGTAACACATCACTG  
ACCCAGAGGAAATTTTGTAGTCATTGAATATGAAAGCAGCTATGGGAGCACTATACAAAGGCAAGAAGAAAGAAGCTCTCAGCGA  
GCTCACACTAGATGAGCAGGAGGCAATGCTCAAAGCAAGTTGCCTGCGACTGTATACGGGAAAGCTGGGAATTTGGAATGGCTCA  
TTGAAAGCAGAGTTGCGTCCAATTTGAGAAGGTTGAAAACAACAAAACGCGAACCTTTCACAGCAGCACCAATAGACACTCTTCTTG  
CTGGTAAAGTTTTCGCTGGATGATTTCAACAATCAATTTTATGATCTCAACATAAAGGCACCATGGACAGTTGGTATGACTAAGTT  
TTATCAGGGGTGGAATGAATTTGATGGAGGCTTTACCAAGTGGGTGGGTGTATTGTGACGCTGATGGTTCGCAATTCGACAGTTCC  
TTGACTCCATTCTCATTAAATGCTGTATTGAAAGTGCAGCTTGCCCTCATGGAGGAATGGGATATTGGTGAGCAAATGCTGCGAA  
ATTTGTACACTGAGATAGTGTATACACCAATCTCACACCGGATGGTACTATCATTAAGAAGCATAAAGGCAACAATAGCGGGCA  
ACCTTCAACAGTGGTGGACAACACACTCATGGTCATTATTGCAATGTTATACACATGTGAGAAGTGTGGAATCAACAAGGAAGAG  
ATTGTGTATTACGTCAATGGCGATGACCTATTGATTGCCATTCACCCAGATAAAGCTGAGAGGTTGAGTGGATTCAAAGAATCTT  
TCGGAGAGTTGGGCCTGAAATATGAATTTGACTGCACCACCAGGGACAAGACACAGTTGTGGTTCATGTCCACACAGGGCTTTGGA  
GAGGGATGGCATGTATATACCAAAGCTAGAAGAAGAAAGGATTGTTTCTATTTTGGAAATGGGACAGATCCAAAGAGCCGTCACAT  
AGGCTTGAAGCCATCTGTGCATCAATGATCGAAGCATGGGGTTATGACAAGCTGGTTGAAGAAATCCGCAATTTCTATGCATGGG  
TTTTTGAACAAGCGCCGTATTACAGCTTGCAGAAGAAGGAAAGGCGCCATATCTGGCTGAGACTGCGCTTAAGTTTTTGTACAC  
ATCTCAGCACGGAACAAACTCTGAGATAGAAGAGTATTTAAAAGTGTGTATGATTACGATATTCCAACGACTGAGAATCTTTAT  
TTTCAG

>TEVANIb-Ros1-Nib6 (Nib insertion between positions 5532-5533 of TEVANIb-Ros1)

GGGGAGAAGAGGAAATGGGTTCGTGGAAGCACTGTCAGGGAACCTTGAGGCCAGTGGCTGAGTGTCCCAGTCAGTTAGTCACAAAGC  
ATGTGGTTAAAGGAAAGTGTCCCCTCTTTGAGCTCTACTTGCAGTTGAAATCCAGAAAAGGAAGCATATTTTAAACCGATGATGGG  
AGCATATAAGCCAAGTCGACTTAATAGAGAGGCGTTCCCTCAAGGACATTTCTAAAAATATGCTAGTGAATTTGAGATTGGGAATGTG  
GATTGTGACTTGTCTGGAGCTTGAATAAGCATGCTCATCACAAAGCTCAAGGCGTTAGGATTCCCAACGTGTAACACATCACTG  
ACCCAGAGGAAATTTTGTAGTCATTGAATATGAAAGCAGCTATGGGAGCACTATACAAAGGCAAGAAGAAAGAAGCTCTCAGCGA  
GCTCACACTAGATGAGCAGGAGGCAATGCTCAAAGCAAGTTGCCTGCGACTGTATACGGGAAAGCTGGGAATTTGGAATGGCTCA  
TTGAAAGCAGAGTTGCGTCCAATTTGAGAAGGTTGAAAACAACAAAACGCGAACCTTTCACAGCAGCACCAATAGACACTCTTCTTG  
CTGGTAAAGTTTTCGCTGGATGATTTCAACAATCAATTTTATGATCTCAACATAAAGGCACCATGGACAGTTGGTATGACTAAGTT  
TTATCAGGGGTGGAATGAATTTGATGGAGGCTTTACCAAGTGGGTGGGTGTATTGTGACGCTGATGGTTCGCAATTCGACAGTTCC  
TTGACTCCATTCTCATTAAATGCTGTATTGAAAGTGCAGCTTGCCCTCATGGAGGAATGGGATATTGGTGAGCAAATGCTGCGAA  
ATTTGTACACTGAGATAGTGTATACACCAATCTCACACCGGATGGTACTATCATTAAGAAGCATAAAGGCAACAATAGCGGGCA  
ACCTTCAACAGTGGTGGACAACACACTCATGGTCATTATTGCAATGTTATACACATGTGAGAAGTGTGGAATCAACAAGGAAGAG  
ATTGTGTATTACGTCAATGGCGATGACCTATTGATTGCCATTCACCCAGATAAAGCTGAGAGGTTGAGTGGATTCAAAGAATCTT  
TCGGAGAGTTGGGCCTGAAATATGAATTTGACTGCACCACCAGGGACAAGACACAGTTGTGGTTCATGTCCACACAGGGCTTTGGA  
GAGGGATGGCATGTATATACCAAAGCTAGAAGAAGAAAGGATTGTTTCTATTTTGGAAATGGGACAGATCCAAAGAGCCGTCACAT  
AGGCTTGAAGCCATCTGTGCATCAATGATCGAAGCATGGGGTTATGACAAGCTGGTTGAAGAAATCCGCAATTTCTATGCATGGG  
TTTTTGAACAAGCGCCGTATTACAGCTTGCAGAAGAAGGAAAGGCGCCATATCTGGCTGAGACTGCGCTTAAGTTTTTGTACAC  
ATCTCAGCACGGAACAAACTCTGAGATAGAAGAGTATTTAAAAGTGTGTATGATTACGATATTCCAACGACTGAGAATCTTTAT  
TTTCAG

>TEVANIb-Ros1-Nib7 (Nib insertion between positions 5691-5692 of TEVANIb-Ros1)

GGGGAGAAGAGGAAATGGGTTCGTGGAAGCACTGTCAGGGAACCTTGAGGCCAGTGGCTGAGTGTCCCAGTCAGTTAGTCACAAAGC  
ATGTGGTTAAAGGAAAGTGTCCCCTCTTTGAGCTCTACTTGCAGTTGAAATCCAGAAAAGGAAGCATATTTTAAACCGATGATGGG  
AGCATATAAGCCAAGTCGACTTAATAGAGAGGCGTTCCCTCAAGGACATTTCTAAAAATATGCTAGTGAATTTGAGATTGGGAATGTG  
GATTGTGACTTGTCTGGAGCTTGAATAAGCATGCTCATCACAAAGCTCAAGGCGTTAGGATTCCCAACGTGTAACACATCACTG  
ACCCAGAGGAAATTTTGTAGTCATTGAATATGAAAGCAGCTATGGGAGCACTATACAAAGGCAAGAAGAAAGAAGCTCTCAGCGA  
GCTCACACTAGATGAGCAGGAGGCAATGCTCAAAGCAAGTTGCCTGCGACTGTATACGGGAAAGCTGGGAATTTGGAATGGCTCA  
TTGAAAGCAGAGTTGCGTCCAATTTGAGAAGGTTGAAAACAACAAAACGCGAACCTTTCACAGCAGCACCAATAGACACTCTTCTTG  
CTGGTAAAGTTTTCGCTGGATGATTTCAACAATCAATTTTATGATCTCAACATAAAGGCACCATGGACAGTTGGTATGACTAAGTT  
TTATCAGGGGTGGAATGAATTTGATGGAGGCTTTACCAAGTGGGTGGGTGTATTGTGACGCTGATGGTTCGCAATTCGACAGTTCC  
TTGACTCCATTCTCATTAAATGCTGTATTGAAAGTGCAGCTTGCCCTCATGGAGGAATGGGATATTGGTGAGCAAATGCTGCGAA  
ATTTGTACACTGAGATAGTGTATACACCAATCTCACACCGGATGGTACTATCATTAAGAAGCATAAAGGCAACAATAGCGGGCA  
ACCTTCAACAGTGGTGGACAACACACTCATGGTCATTATTGCAATGTTATACACATGTGAGAAGTGTGGAATCAACAAGGAAGAG  
ATTGTGTATTACGTCAATGGCGATGACCTATTGATTGCCATTCACCCAGATAAAGCTGAGAGGTTGAGTGGATTCAAAGAATCTT  
TCGGAGAGTTGGGCCTGAAATATGAATTTGACTGCACCACCAGGGACAAGACACAGTTGTGGTTCATGTCCACACAGGGCTTTGGA  
GAGGGATGGCATGTATATACCAAAGCTAGAAGAAGAAAGGATTGTTTCTATTTTGGAAATGGGACAGATCCAAAGAGCCGTCACAT  
AGGCTTGAAGCCATCTGTGCATCAATGATCGAAGCATGGGGTTATGACAAGCTGGTTGAAGAAATCCGCAATTTCTATGCATGGG  
TTTTTGAACAAGCGCCGTATTACAGCTTGCAGAAGAAGGAAAGGCGCCATATCTGGCTGAGACTGCGCTTAAGTTTTTGTACAC  
ATCTCAGCACGGAACAAACTCTGAGATAGAAGAGTATTTAAAAGTGTGTATGATTACGATATTCCAACGACTGAGAATCTTTAT  
TTTCAG

>TEVANIb-Ros1-Nib8 (Nib insertion between positions 6255-6256 of TEVANIb-Ros1)

GGGGAGAAGAGGAAATGGGTTCGTGGAAGCACTGTCAGGGAACCTTGAGGCCAGTGGCTGAGTGTCCCAGTCAGTTAGTCACAAAGC  
ATGTGGTTAAAGGAAAGTGTCCCCTCTTTGAGCTCTACTTGCAGTTGAAATCCAGAAAAGGAAGCATATTTTAAACCGATGATGGG  
AGCATATAAGCCAAGTCGACTTAATAGAGAGGCGTTCCCTCAAGGACATTTCTAAAAATATGCTAGTGAATTTGAGATTGGGAATGTG

GATTGTGACTTGCTGGAGCTTGCAATAAGCATGCTCATCACAAGCTCAAGGCGTTAGGATTCCCAACGTGTAACACTACATCACTG  
ACCCAGAGGAAATTTTTAGTGCATTGAATATGAAAGCAGCTATGGGAGCATAACAAAGGCAAGAAGAAAGACTCTCAGCGA  
GCTCACACTAGATGAGCAGGAGGCAATGCTCAAAGCAAGTTGCCCTGCGACTGTATACGGGAAAGCTGGGAATTTGGAATGGCTCA  
TTGAAAGCAGAGTTGCGTCCAATTGAGAAGGTTGAAAACAACAAAACGCGAACTTTCACAGCAGCACCAATAGACACTCTTCTTG  
CTGGTAAAGTTTTCGCTGGATGATTTCAACAATCAATTTTTATGATCTCAACATAAAGGCACCATGGACAGTTGGTATGACTAAGTT  
TTATCAGGGGTGGAATGAATTGATGGAGGCTTTACCAAGTGGGTGGGTGTTATGACGCTGATGGTTCGCAATTCGACAGTTCC  
TTGACTCCATTCTCATTAAATGCTGTATTGAAAGTGCAGCTTGCCCTCATGGAGGAATGGGATATTGGTGAGCAAATGCTGCGAA  
ATTTGTACACTGAGATAGTGTATACACCAATCTCACACCGGATGGTACTATCATTAAGAAGCATAAAGGCAACAATAGCGGGCA  
ACCTTCAACAGTGGTGGACAACACACTCATGGTCATTATTGCAATGTTATACACATGTGAGAAGTGTGGAATCAACAAGGAAGAG  
ATTGTGTATTACGTCAATGGCGATGACCTATTGATTGCCATTCACCCAGATAAAGCTGAGAGGTTGAGTGGATTCAAAGAATCTT  
TCGGAGAGTTGGGCTGAAATATGAATTTGACTGCACCACCAGGGACAAGACACAGTTGTGGTTCATGTACACAGGGCTTTGGA  
GAGGGATGGCATGTATATACCAAAGCTAGAAGAAGAAAGGATTGTTTCTATTTTGGAAATGGGACAGATCCAAAGAGCCGTCACAT  
AGGCTTGAAGCCATCTGTGCATCAATGATCGAAGCATGGGGTTATGACAAGCTGGTTGAAGAAATCCGCAATTTCTATGCATGGG  
TTTTTGAACAAGCGCCGTATTTCACAGCTTGCAGAAGAAGGAAAGGCGCCATATCTGGCTGAGACTGCGCTTAAGTTTTTGTACAC  
ATCTCAGCACGGAACAAACTCTGAGATAGAAGAGTATTTAAAAGTGTGTATGATTACGATATTTCAACGACTGAGAATCTTTAT  
TTTCAG

>TEVANIb-Ros1-NIb9 (NIb insertion between positions 8463-8464 of TEVANIb-Ros1; NIb included the indicated the indicated extra nucleotides)

GAGAATCTTTATTTTCAGGGGGAGAAGAGGAAATGGTCTGGAAGCACTGTCAGGGAACTTGAGGCCAGTGGCTGAGTGTCCCA  
GTCAGTTAGTCACAAAGCATGTGGTTAAAGGAAAGTGTCCCTCTTTGAGCTCTACTTGCAGTTGAATCCAGAAAAGGAAGCATA  
TTTTAAACCGATGATGGGAGCATATAAGCCAAGTCGACTTAATAGAGAGGCGTTCCCTCAAGGACATTCAAAATATGCTAGTGAA  
ATTGAGATTGGGAATGTGGATTGTGACTTGCTGGAGCTTGCAATAAGCATGCTCATCACAAGCTCAAGGCGTTAGGATTCCCAA  
CTGTGAACTACATCACTGACCCAGAGGAAATTTTTAGTGCATTGAATATGAAAGCAGCTATGGGAGCATAACAAAGGCAAGAA  
GAAAGAAGCTCTCAGCGAGCTCACACTAGATGAGCAGGAGGCAATGCTCAAAGCAAGTTGCCCTGCGACTGTATACGGGAAAGCTG  
GGAATTTGGAATGGCTCATTGAAAGCAGAGTTGCGTCCAATTGAGAAGGTTGAAAACAACAAAACGCGAACTTTCACAGCAGCAC  
CAATAGACACTCTTCTTGCTGGTAAAGTTTTCGCTGGATGATTTCAACAATCAATTTTTATGATCTCAACATAAAGGCACCATGGAC  
AGTTGGTATGACTAAGTTTTATCAGGGGTGGAATGAATTGATGGAGGCTTTACCAAGTGGGTGGGTGTTATGACGCTGATGGT  
TCGCAATTCGACAGTTCCCTTGACTCCATTCTCATTAAATGCTGTATTGAAAGTGCAGCTTGCCCTCATGGAGGAATGGGATATTG  
GTGAGCAAATGCTGCGAAATTTGTACACTGAGATAGTGTATACACCAATCTCACACCGGATGGTACTATCATTAAGAAGCATAA  
AGGCAACAATAGCGGGCAACCTTCAACAGTGGTGGACAACACACTCATGGTCATTATTGCAATGTTATACACATGTGAGAAGTGT  
GGAATCAACAAGGAAGAGATTGTGTATTACGTCAATGGCGATGACCTATTGATTGCCATTCACCCAGATAAAGCTGAGAGGTTGA  
GTGGATTCAAAGAATCTTTTCGGAGAGTTGGGCTGAAATATGAATTTGACTGCACCACCAGGGACAAGACACAGTTGTGGTTCAT  
GTCACACAGGGCTTTGGAGAGGGATGGCATGTATATACCAAAGCTAGAAGAAGAAAGGATTGTTTCTATTTTGGAAATGGGACAGA  
TCCAAAGAGCCGTCACATAGGCTTGAAGCCATCTGTGCATCAATGATCGAAGCATGGGGTTATGACAAGCTGGTTGAAGAAATCC  
GCAATTTCTATGCATGGGTTTTTGAACAAGCGCCGTATTTCACAGCTTGCAGAAGAAGGAAAGGCGCCATATCTGGCTGAGACTGC  
GCTTAAGTTTTTGTACACATCTCAGCACGGAACAAACTCTGAGATAGAAGAGTATTTAAAAGTGTGTATGATTACGATATTTCA  
ACGACTGAGAATCTTTATTTTCAG
